# Supplementary material for: Synthesis of a new photosensitizer for laser-mediated photodynamic therapy to kill cancer cells in gliomas
Source: Royal Society of Chemistry journal article supplement (doi:10.1039/d4ma00637b), 2024-01-01
Supplement: d4ma00637b1.pdf [file d4ma00637b1.pdf]

## Synthesis of a new photosensitizer for laser-mediated photodynamic therapy to kill cancer cells in gliomas

Guangshu Liang<sup>1</sup>, Yining Yang<sup>1</sup>, Daofu Cheng, Yuyan Ma, Linping Yan\*

Department of Clinical Laboratory, Jiangsu Cancer Hospital & Jiangsu Institute of  
Cancer Research & The Affiliated Cancer Hospital of Nanjing Medical University,  
Nanjing, 210009, China. E-mail addresses: [yanlinping@njmu.edu.cn](mailto:yanlinping@njmu.edu.cn).

<sup>1</sup> These authors contributed equally to this work.

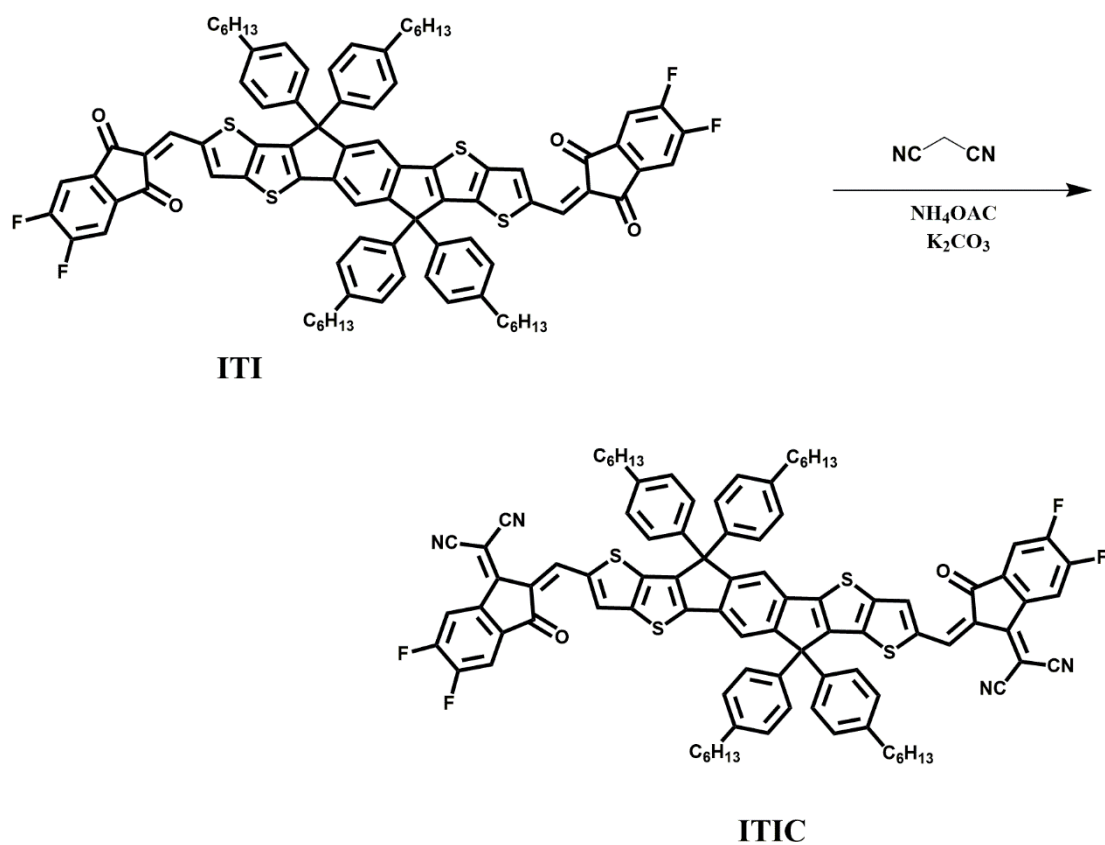

Fig. S1 Synthetic route of ITIC.

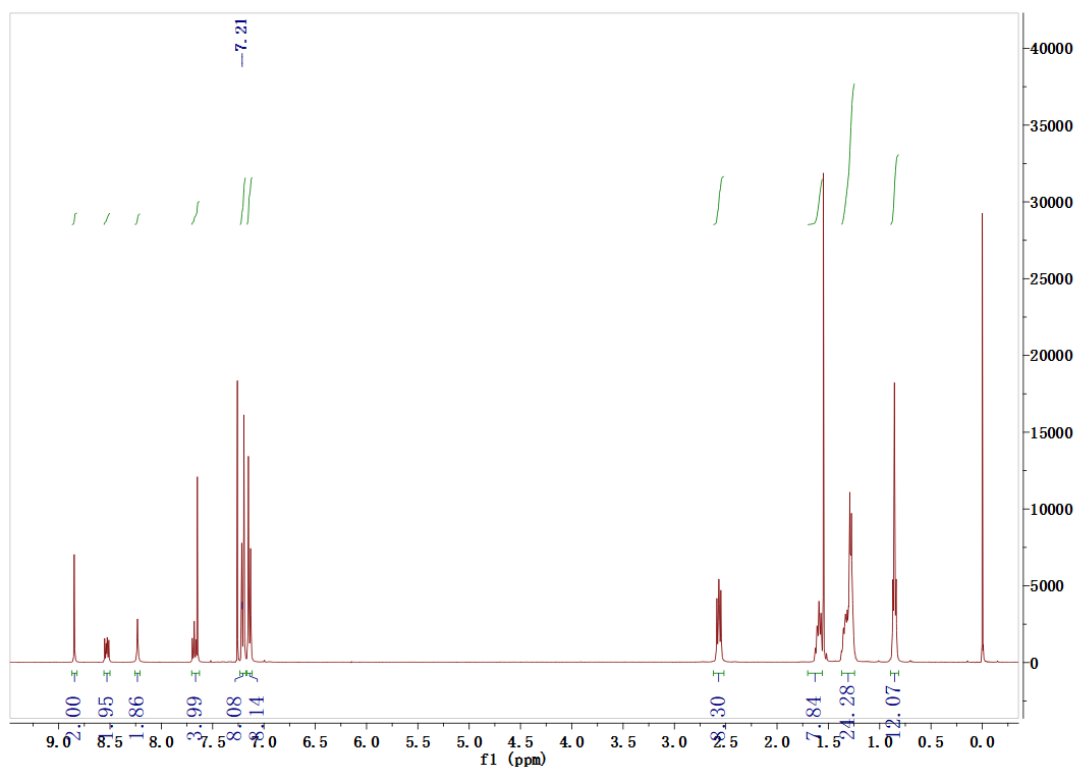

Fig. S2  $^1\text{H}$ NMR of ITIC in  $\text{CDCl}_3$  (400 Hz).

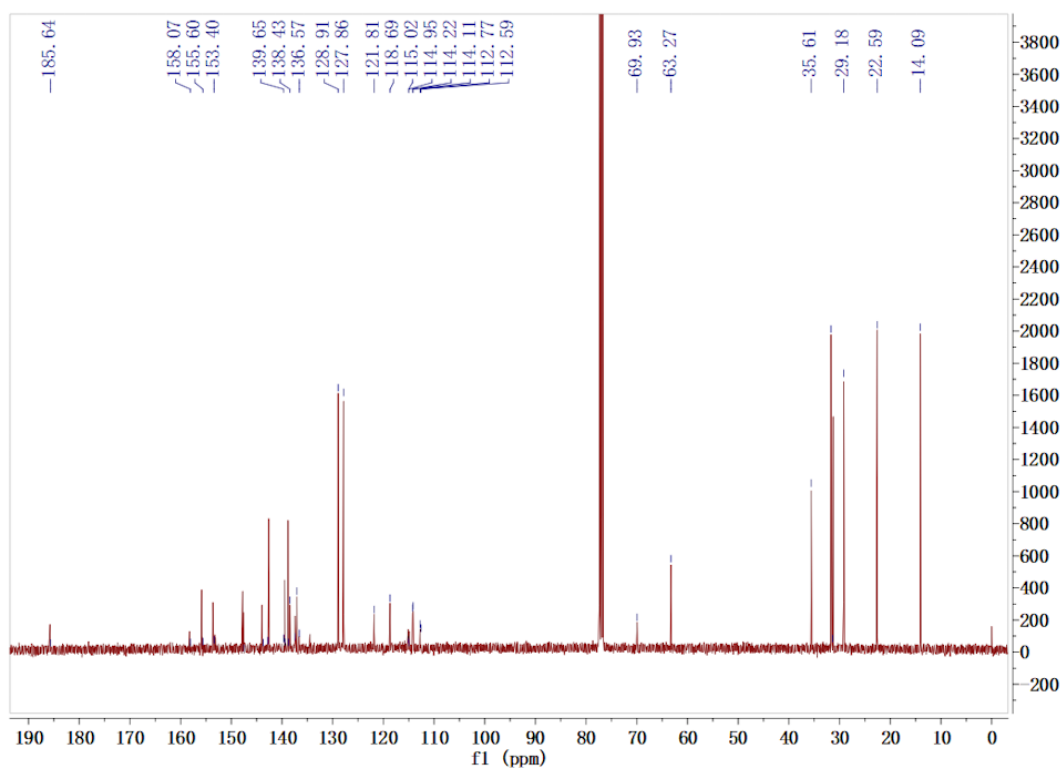

Fig. S3  $^{13}\text{C}$ NMR of ITIC in  $\text{CDCl}_3$  (400 Hz).

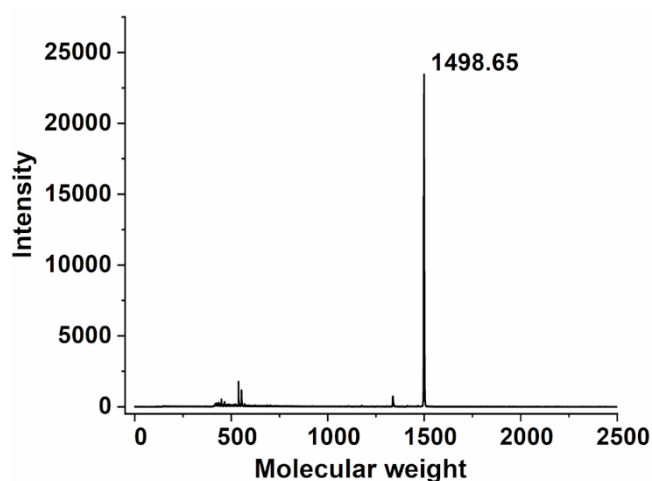

Fig. S4 Maldi-tof of ITIC.

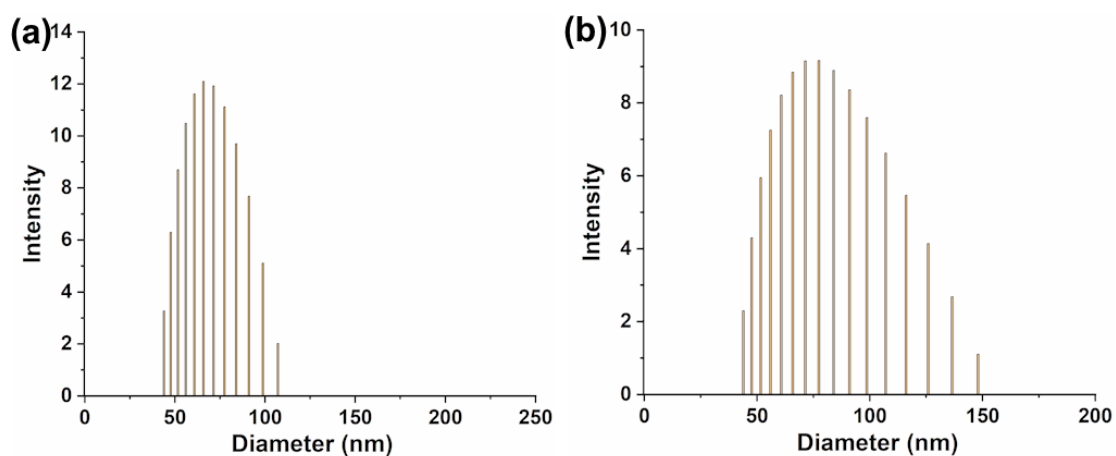

Fig. S5 DLS of ITIC NPs in (a) DMEM and (b) PBS.

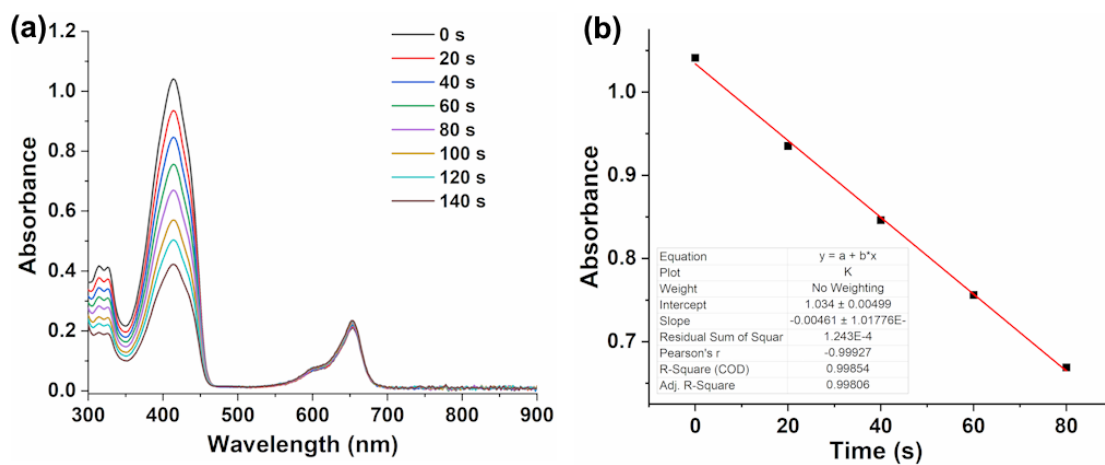

Fig. S6 (a) Degradation of methylene blue with irradiation. (b) Linear fitting of absorbance and irradiation time.
